# Supplementary material for: Kocuria LAT6 Enhances Wheat Salt Tolerance via Modulation of Rhizosphere Microbial Function and Nitrogen Cycling
Source: Research Square preprint supplement (doi:10.21203/rs.3.rs-7457763/v1), 2025-10-30
Supplement: Supplementary file 1 [file 0da9f5de1ecceea6e5388d00.docx]

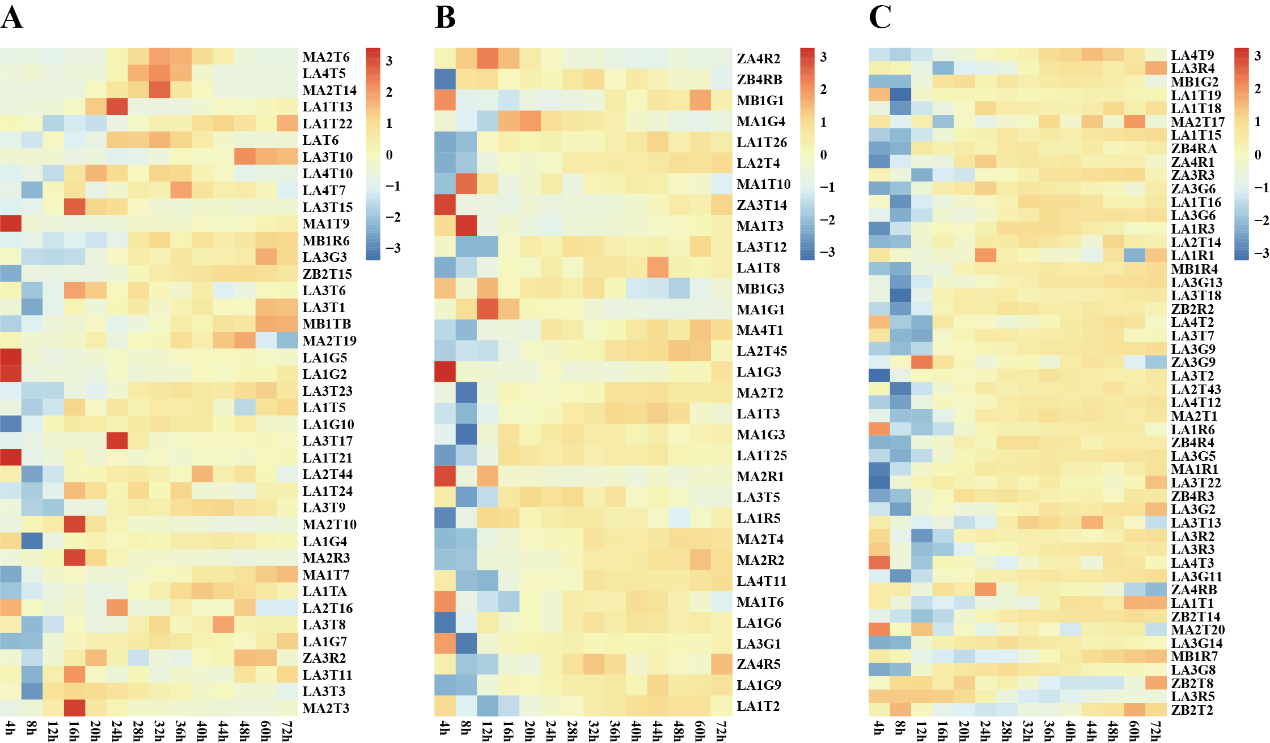


Fig. S1 Salt tolerance test of the strains.

According to the comparison of OD600 absorbance values in 500 mM NaCl TSB medium and normal TSB medium, it is classified as follows: **A** Halophilic bacteria: average OD600 (NaCl)/OD600 (normal) > 1.1. **B** Halotolerant bacteria: 1.0 < average OD600 (NaCl)/OD600 (normal) < 1.1. **C** Non-halotolerant bacteria: average OD600 (NaCl)/OD600 (normal) < 1.0.


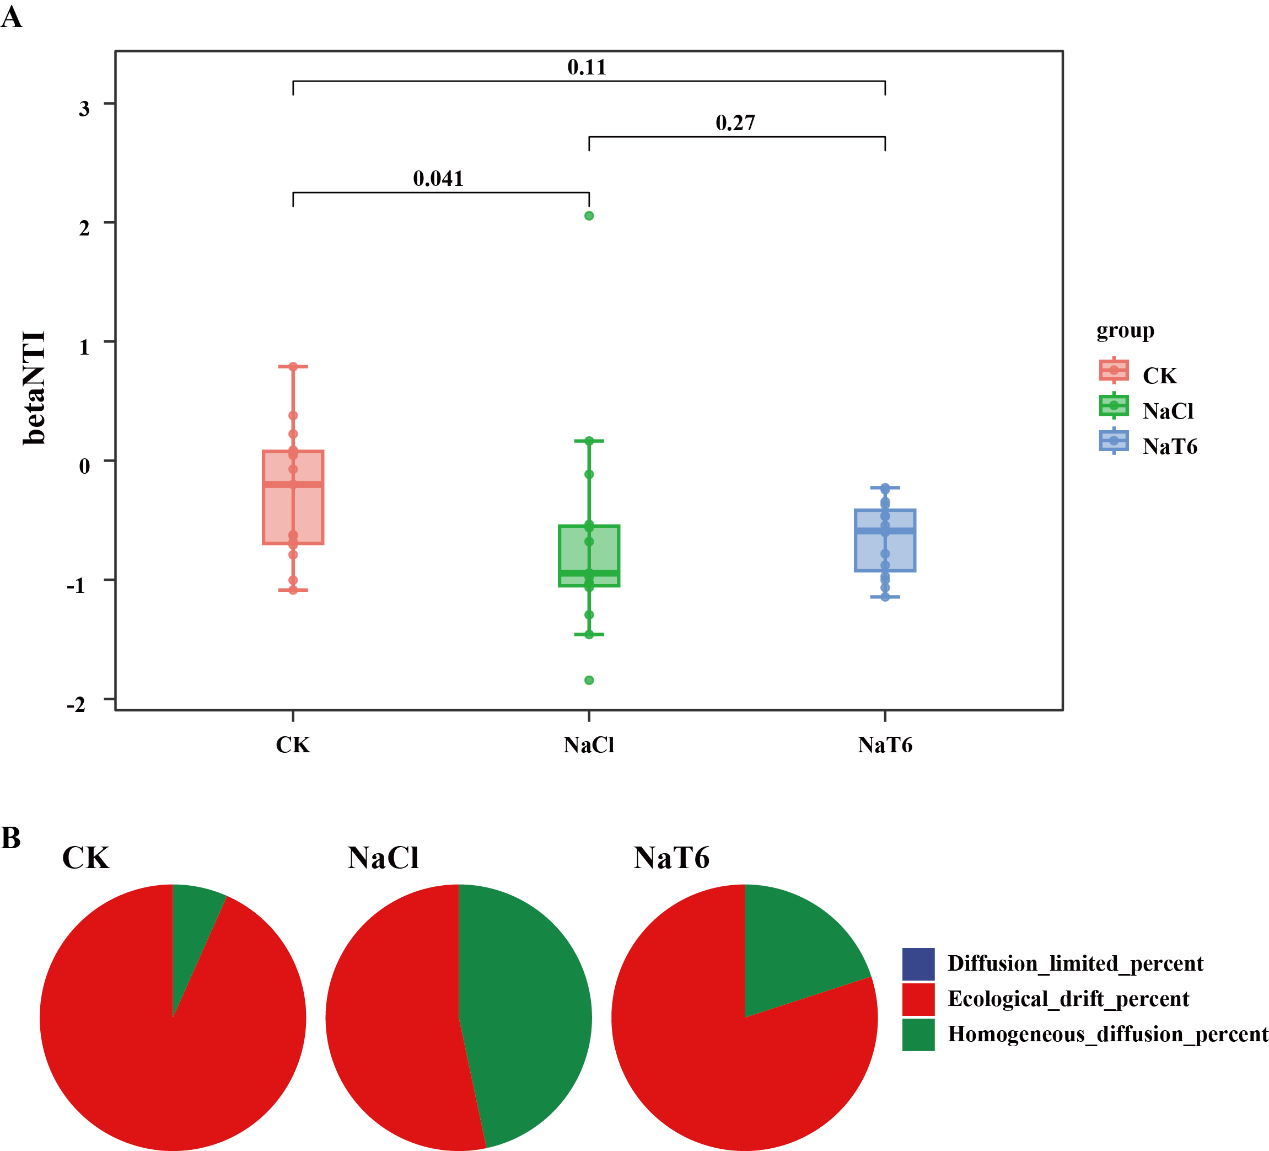


Fig. S2 The effects of different treatments on community assembly mechanisms.

**A** Boxplot of betaNTI values across different sampling groups (CK, NaCl, NaT6); **B** Pie charts showing the relative contributions of community assembly processes (Diffusion limited percent, Ecological drift percent, Homogeneous diffusion percent) in CK, NaCl, and NaT6 groups, respectively.


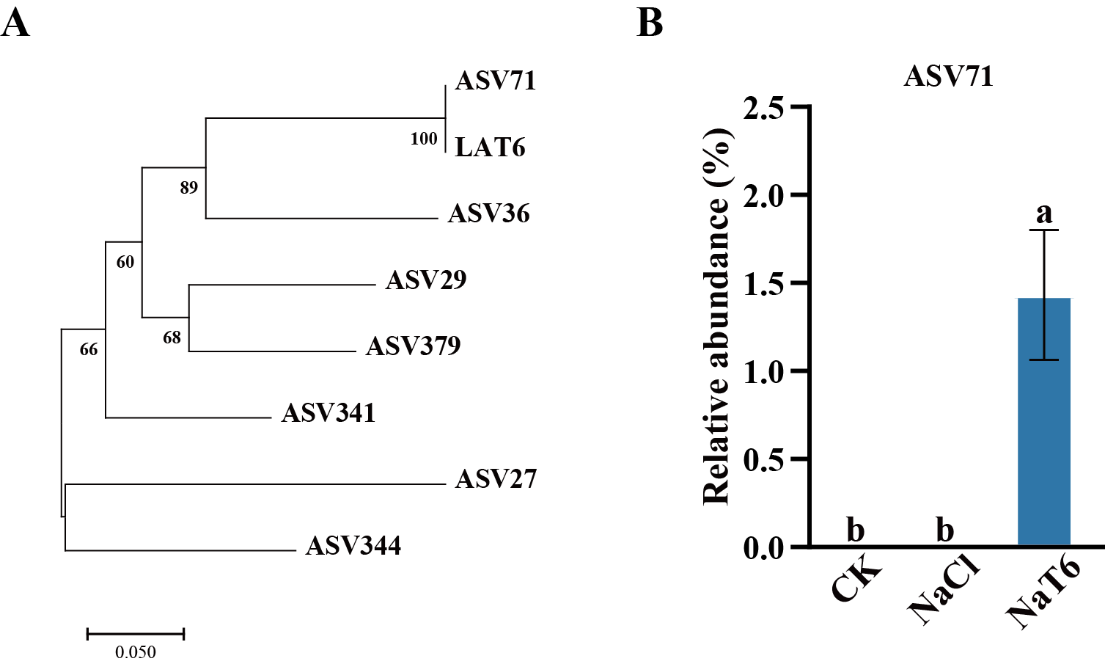


Fig. S3 Colonization of LAT6.

**A** Phylogenetic analysis of LAT6 and ASV showed that ASV71 has 100% similarity with LAT6. **B** The abundance of ASV71 in different treatments.


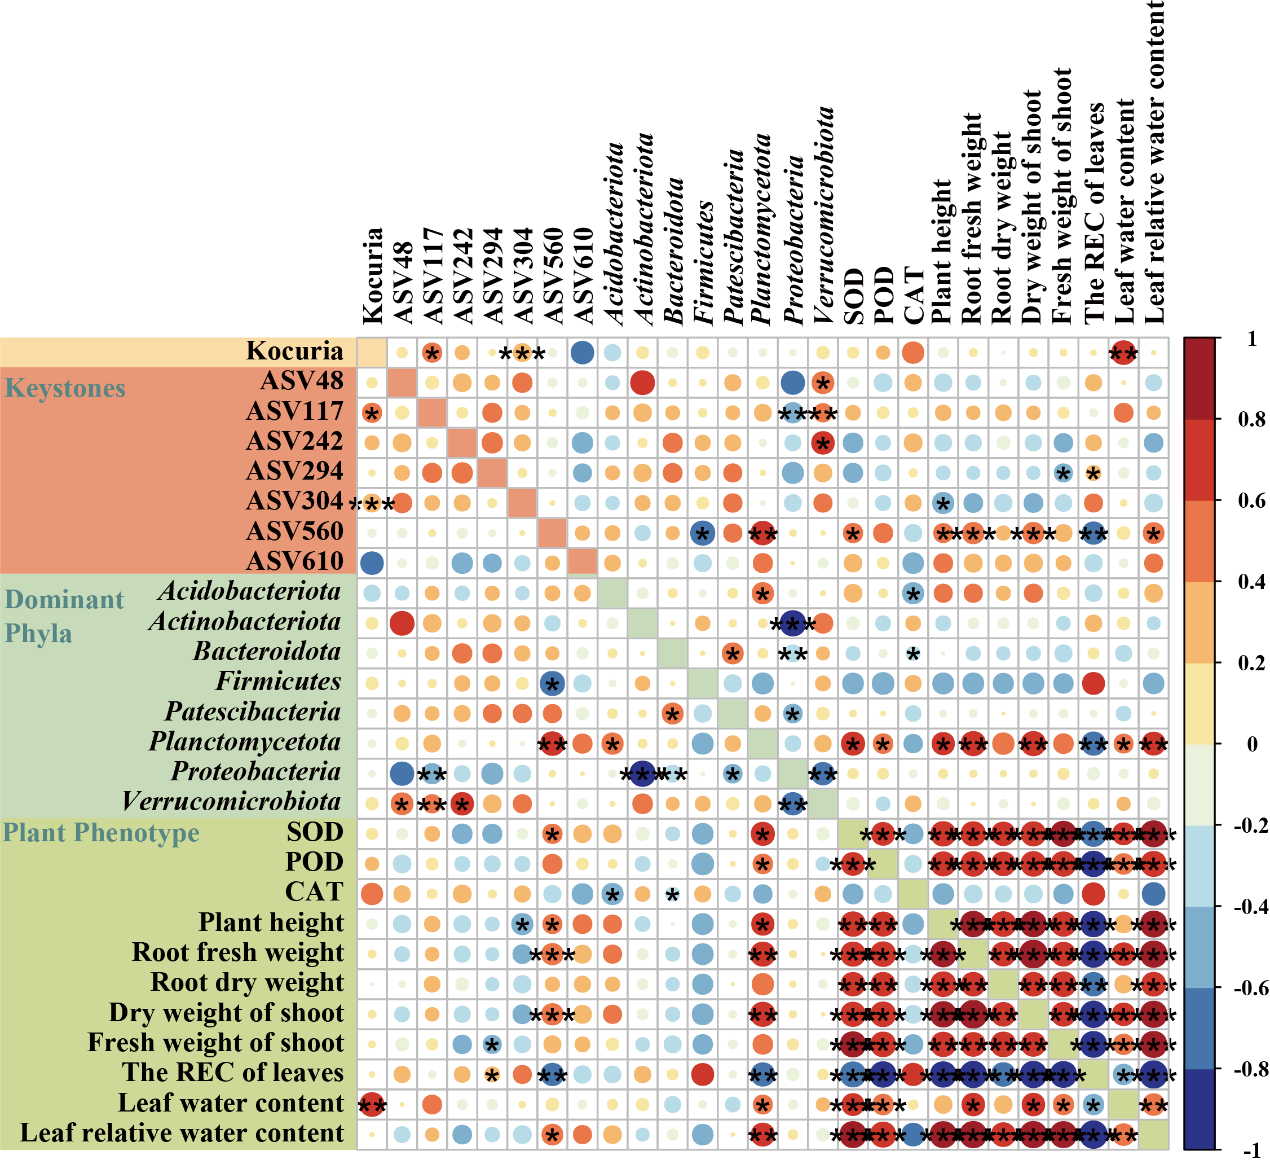


Fig. S4 Heatmap showing the correlation analysis results between keystone taxa, dominant bacterial phyla, and plant phenotypic traits. The color gradient represents the correlation coefficient (from –1 to 1), with red indicating positive correlation and blue indicating negative correlation. Asterisks denote the significance levels: * *P* < 0.05, ** *P* < 0.01, *** *P* < 0.001. Keystone taxa, dominant phyla, and plant phenotypes (including physiological indices like SOD, POD, CAT and growth–related traits) are displayed on the y–axis and x–axis respectively, visualizing their pairwise associations in the studied system.


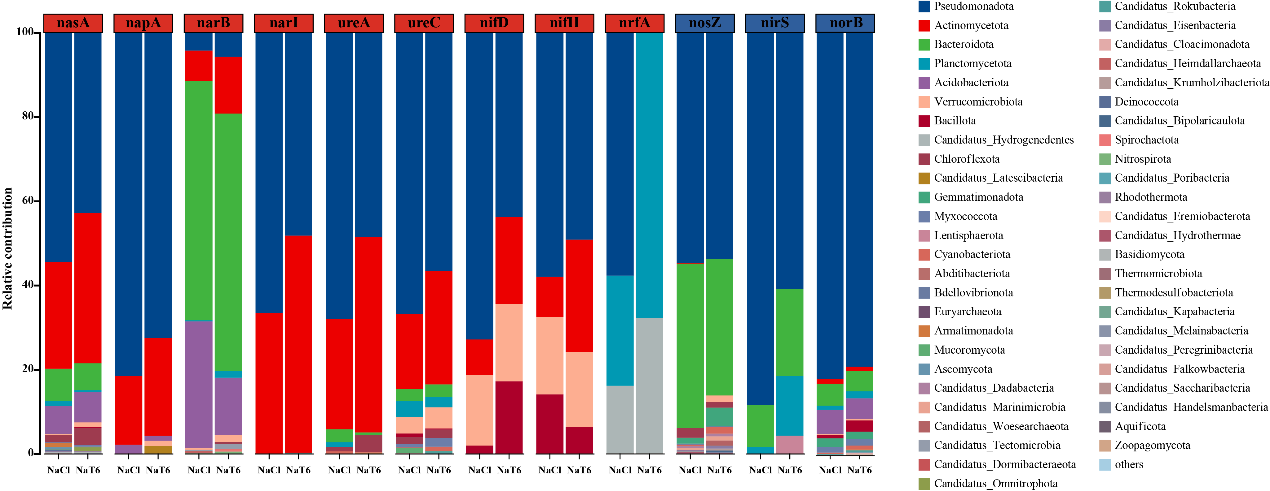


Fig. S5 The contributions of different microbial genera to 12 important phyla related to the N cycle. The horizontal axis at the top indicates the corresponding functional names, and different colors in the columns represent different microbial classifications.


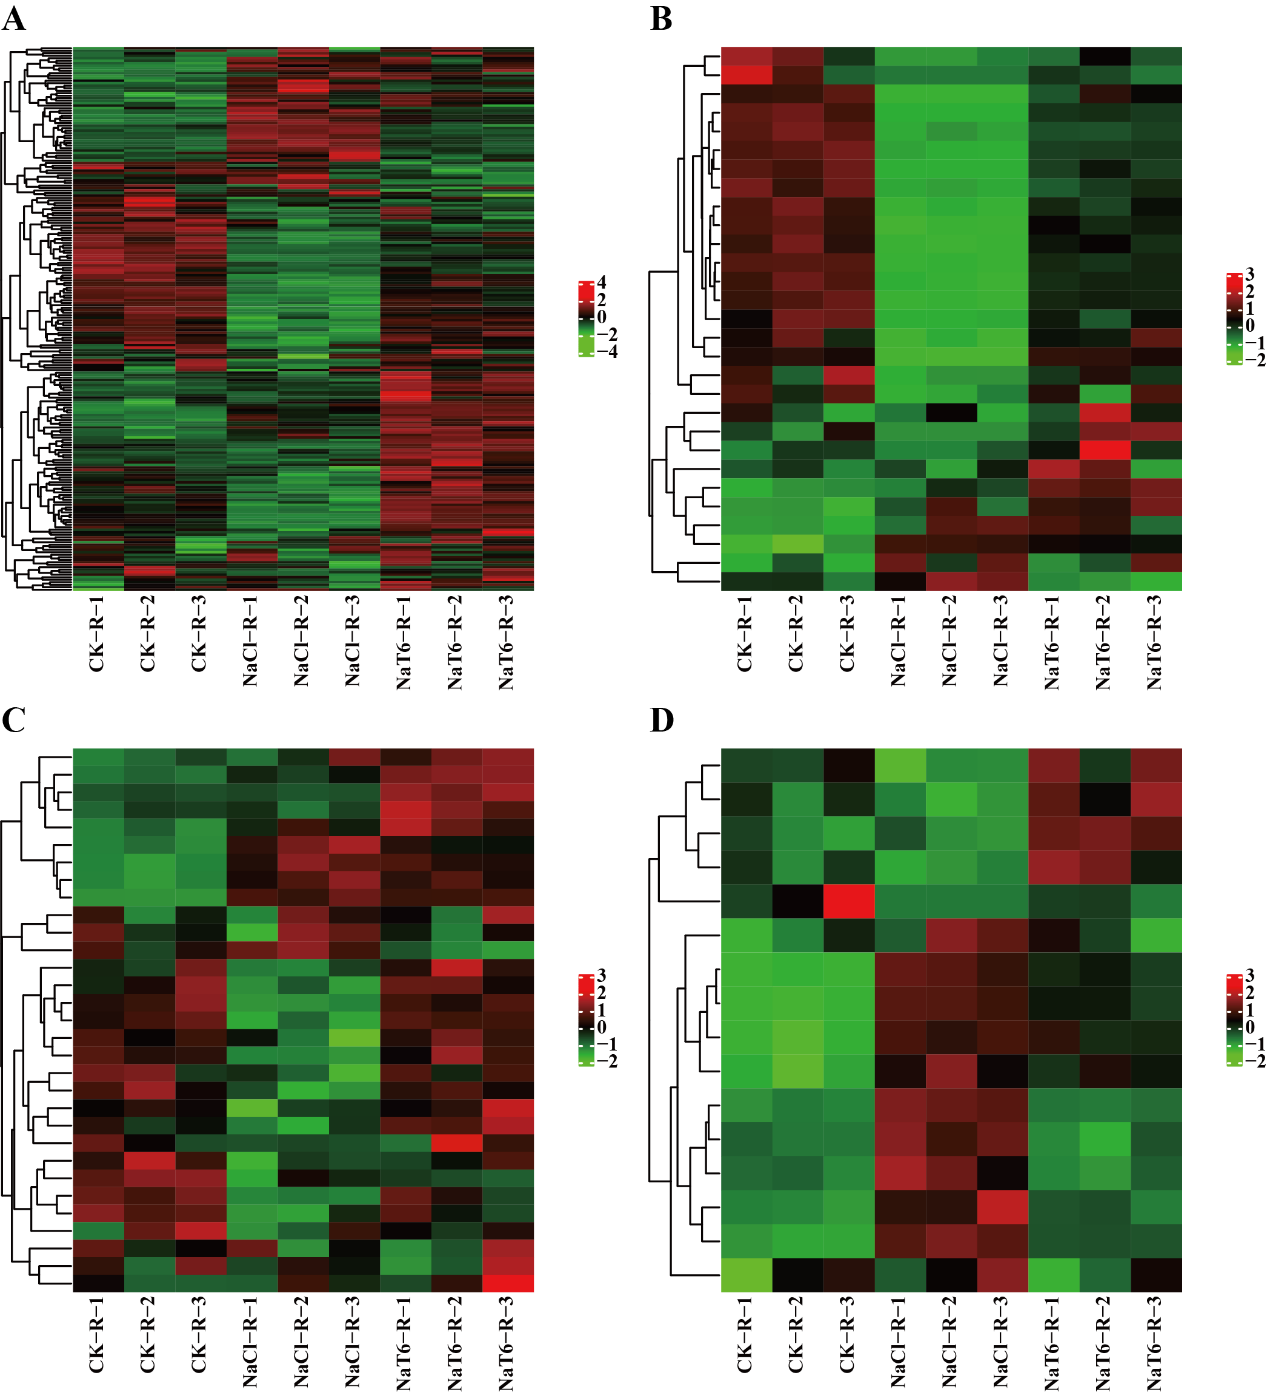


Fig. S6 Expression analysis of nitrate transporters genes. Heat map showing the expression of NPF (A), NRT2 (B), CLC (C)and SLAC1/SLAH (D) nitrate transporters genes between the CK, NaCl, and the NaT6 groups in root tissue, genes showing similar patterns of expression are clustered.

Table S1 Identification of Plant Growth-Promoting Characteristics of Strains

| ID | Taxonomy | Nitrogen Fixation | Siderophore Production | IAA Production |
| --- | --- | --- | --- | --- |
| LA1T1 | *Bacillus* sp. | + | + | + |
| LA1T2 | *Curtobacterium* sp. | + | + | + |
| LA1T3 | *Curtobacterium* sp. | + |  | + |
| LA1T5 | *Kocuria* sp. | + |  |  |
| LAT6 | *Kocuria* sp. | + | + | + |
| LA1T8 | *Bacillus* sp. | + | + | + |
| LA1T13 | *Kocuria* sp. | + |  | + |
| LA1T15 | *Bacillus* sp. | + | + | + |
| LA1T16 | *Bacillus* sp. | + | + |  |
| LA1T18 | *Bacillus* sp. | + | + | + |
| LA1T19 | *Bacillus* sp. | + |  | + |
| LA1T21 | *Bacillus* sp. | + | + | + |
| LA1T22 | *Bacillus* sp. | + | + |  |
| LA1T24 | *Kocuria* sp. |  | + | + |
| LA1T25 | *Bacillus* sp. | + | + | + |
| LA1T26 | *Bacillus* sp. | + |  | + |
| LA1G2 | *Bacillus* sp. | + | + |  |
| LA1G3 | *Bacillus* sp. | + | + | + |
| LA1G4 | *Bacillus* sp. | + | + | + |
| LA1G5 | *Bacillus* sp. | + | + | + |
| LA1G6 | *Priestia* sp. | + |  | + |
| LA1G7 | *Brevibacterium* sp. | + | + |  |
| LA1G9 | *Bacillus* sp. | + | + | + |
| LA1G10 | *Bacillus* sp. | + | + | + |
| LA1R1 | *Arthrobacter* sp. | + | + | + |
| LA1R3 | *Bacillus* sp. | + | + |  |
| LA1R5 | *Bacillus* sp. | + | + | + |
| LA1R6 | *Curtobacterium* sp. | + |  | + |
| LA1TA | *Priestia* sp. | + | + | + |
| LA2T4 | *Paenarthrobacter* sp. | + | + | + |
| LA2T14 | *Bacillus* sp. | + | + | + |
| LA2T16 | *Bacillus cereus* | + | + | + |
| LA2T43 | *Bacillus* sp. | + | + | + |
| LA2T44 | *Bacillus* sp. | + |  | + |
| LA2T45 | *Bacillus* sp. |  | + |  |
| LA3T1 | *Kocuria* sp. |  |  |  |
| LA3T2 | *Pseudarthrobacter oxydans* | + |  | + |
| LA3T3 | *Bacillus* sp. | + | + | + |
| LA3T5 | *Bacillus* sp. | + | + |  |
| LA3T6 | *Planococcus* sp. | + | + | + |
| LA3T7 | *Bacillus* sp. | + |  | + |
| LA3T8 | *Paenarthrobacter* sp. | + | + | + |
| LA3T9 | *Bacillus* sp. | + |  |  |
| LA3T10 | *Planococcus* sp. | + | + |  |
| LA3T11 | *Arthrobacter* sp. | + | + | + |
| LA3T12 | *Bacillus* sp. | + | + | + |
| LA3T13 | *Rhodococcus* sp. | + | + | + |
| LA3T15 | *Kocuria* sp. | + |  | + |
| LA3T17 | *Kocuria* sp. | + | + | + |
| LA3T18 | *Priestia* sp. | + | + | + |
| LA3T22 | *Bacillus* sp. | + |  | + |
| LA3T23 | *Bacillus* sp. | + | + | + |
| LA3G1 | *Priestia* sp. | + | + | + |
| LA3G2 | *Arthrobacter* sp. *RF4* | + |  | + |
| LA3G3 | *Arthrobacter* sp. | + | + | + |
| LA3G5 | *Arthrobacter* sp. *RF4* | + |  | + |
| LA3G6 | *Arthrobacter* sp. | + | + | + |
| LA3G8 | *Bacillus* sp. | + |  | + |
| LA3G9 | *Arthrobacter* sp. | + |  | + |
| LA3G11 | *Arthrobacter* sp. | + |  | + |
| LA3G13 | *Arthrobacter* sp. | + |  | + |
| LA3G14 | *Bacillus* sp. | + | + | + |
| LA3R2 | *Arthrobacter* sp. | + | + | + |
| LA3R3 | *Arthrobacter* sp. | + |  | + |
| LA3R4 | *Labedella* sp. | + |  | + |
| LA3R5 | *Microbacterium* sp. | + |  | + |
| LA4T2 | *Arthrobacter* sp. |  |  | + |
| LA4T3 | *Arthrobacter pascens* | + |  | + |
| LA4T5 | *Kocuria* sp. |  |  | + |
| LA4T7 | *Bacillus* sp. | + | + |  |
| LA4T9 | *Bacillus* sp. | + | + | + |
| LA4T10 | *Kocuria* sp. | + |  | + |
| LA4T11 | *Arthrobacter* sp. | + |  | + |
| LA4T12 | *Arthrobacter* sp. | + |  | + |
| MA1T3 | *Zhihengliuella* sp. | + |  | + |
| MA1T6 | *Bacillus* sp. | + |  |  |
| MA1T7 | *Bacillus* sp. |  | + | + |
| MA1T9 | *Halomonas* sp. | + | + | + |
| MA1T10 | *Halomonas* sp. | + | + | + |
| MA1R1 | *Isoptericola* sp. | + | + | + |
| MA1G1 | *Isoptericola* sp. | + | + | + |
| MA1G3 | *Zhihengliuella* sp. | + | + | + |
| MA1G4 | *Isoptericola* sp. | + |  | + |
| MA2T1 | *Arthrobacter* sp. | + |  | + |
| MA2T2 | *Halomonas* sp. | + |  | + |
| MA2T3 | *Isoptericola* sp. | + | + |  |
| MA2T4 | *Arthrobacter* sp. | + | + |  |
| MA2T6 | *Zhihengliuella* sp. |  |  |  |
| MA2T10 | *Isoptericola* sp. | + | + | + |
| MA2T14 | *Kocuria* sp. | + | + | + |
| MA2T17 | *Bacillus pumilus* | + | + |  |
| MA2T19 | *Bacillus* sp. | + |  |  |
| MA2T20 | *Bacillus pumilus* | + |  |  |
| MA2R1 | *Isoptericola* sp. | + |  | + |
| MA2R2 | *Paenarthrobacter* sp. | + | + | + |
| MA2R3 | *Paenarthrobacter* sp. | + | + | + |
| MA4T1 | *Paenarthrobacter* sp. | + | + | + |
| ZA3T14 | *Bacillus* sp. | + | + | + |
| ZA3G6 | *Bacillus* sp. | + | + | + |
| ZA3G9 | *Bacillus* sp. | + | + | + |
| ZA3R2 | *Bacillus* sp. | + | + | + |
| ZA3R3 | *Bacillus* sp. | + | + | + |
| ZA4R1 | *Bacillus* sp. | + | + |  |
| ZA4R2 | *Isoptericola* sp. | + | + |  |
| ZA4R5 | *Algoriphagus* sp. |  | + | + |
| ZA4RB | *Bacillus* sp. | + |  |  |
| MB1G1 | *Bacillus* sp. | + | + | + |
| MB1G2 | *Bacillus* sp. | + | + | + |
| MB1G3 | *Jeotgalibacillus* sp. | + | + | + |
| MB1R4 | *Priestia* sp. | + | + | + |
| MB1R6 | *Planococcus* sp. | + | + | + |
| MB1R7 | *Rhodococcus* sp. | + | + | + |
| MB1TB | *Bacillus* sp. | + | + | + |
| ZB2T2 | *Bacillus* sp. |  |  | + |
| ZB2T8 | *Bacillus* sp. | + | + | + |
| ZB2T14 | *Bacillus pumilus* | + | + | + |
| ZB2T15 | *Bacillus* sp. | + |  | + |
| ZB2R2 | *Bacillus* sp. | + | + | + |
| ZB4R3 | *Bacillus* sp. | + | + |  |
| ZB4R4 | *Bacillus* sp. | + | + | + |
| ZB4RA | *Bacillus* sp. | + | + |  |
| ZB4RB | *Bacillus* sp. | + | + |  |
